# Supplementary material for: Development of a Model Care Pathway for Myasthenia Gravis
Source: MDPI journal article supplement (doi:10.3390/ijerph182111591), 2021-11-04
Supplement: s1 [file s1]

*S4 - Characteristics of included reviews and other documents.*

| <b>N</b> | <b>Title</b>                                                                               | <b>First author</b>    | <b>Publication year</b> | <b>Topics</b>                                                                                      |
|----------|--------------------------------------------------------------------------------------------|------------------------|-------------------------|----------------------------------------------------------------------------------------------------|
| 1        | The myasthenic patient in crisis: an update of the management in Neuro-intensive Care Unit | Daniel Agustin Godoy   | 2013                    | Process flow/algorithm presented for the Pathophysiology, the management of MG crisis              |
| 2        | Treatment of Myasthenia Gravis                                                             | Constantine Farmakidis | 2018                    | Algorithms presented for the treatment of generalized MG and myasthenic crisis.                    |
| 3        | Myasthenia gravis                                                                          | Nils Erik Gilhus       | 2019                    | Algorithms presented for MG Diagnosis, chronic and acute treatment.                                |
| 4        | Myasthenia gravis: subgroup classification and therapeutic strategies                      | Nils Erik Gilhus       | 2015                    | Care pathway presented for treatment of Generalized MG and MG crisis                               |
| 5        | Myasthenia Gravis                                                                          | Nils Erik Gilhus       | 2016                    | Algorithms presented for the treatment of chronic and acute Generalized MG                         |
| 6        | When myasthenia gravis is deemed refractory: clinical signposts and treatment strategies   | Renato Mantegazza      | 2017                    | The algorithm presented for the treatment of MG                                                    |
| 7        | Diagnosis and management of myasthenia gravis                                              | Sivakumar Sathasivam   | 2014                    | Process flows/algorithms presented for the diagnosis and treatment of Generalized MG and MG crisis |
| 8        | Myasthenia Gravis – A Review of Current Therapeutic Options                                | Saiju Jacob            | 2018                    | The algorithm presented for the treatment MG                                                       |
| 9        | Standard operating procedure (SOP) myasthenic crisis                                       | Henning Stetefeld      | 2019                    | Process flows/algorithms presented for the standard operating procedure of MG crisis               |
| 10       | Treatment of Myasthenia Gravis Based on Its Immunopathogenesis                             | Jee Young Kim          | 2011                    | Process flow/Care pathway presented for management of MG                                           |
| 11       | Autoimmune myasthenia gravis: emerging clinical and biological heterogeneity               | Matthew N Meriggioli   | 2009                    | Process flow/algorithm presented for diagnosis and treatment for MG                                |
| 12       | Outcome Measures in Myasthenia Gravis: Incorporation into Clinical Practice                | Srikanth Muppidi       | 2017                    | Outcome measure instruments for Myasthenia gravis                                                  |
| 13       | Myasthenia gravis: new developments in research and treatment                              | Amelia Evoli           | 2017                    | Benchmarking information for MG from the EURO-NMD network.                                         |
| 14       | Myasthenia Gravis: MGFA Manual for the Health Care Provider                                | James F Howard         | 2009                    | Multi-disciplinary practice recommendations for MG                                                 |
