# Supplementary material for: Development of a Model Care Pathway for Myasthenia Gravis
Source: MDPI journal article supplement (doi:10.3390/ijerph182111591), 2021-11-04
Supplement: s1 [file s1]

*S7- Example of a detailed description of a process indicator.*

|                                         |                                                                                                                                                                                                                                                                                                                                                                                                                                                                                                                                                                                                                                                                                                                                                                                                                                                                                                                                                                                                                                                                                                                                                                                                                                                                                   |
|-----------------------------------------|-----------------------------------------------------------------------------------------------------------------------------------------------------------------------------------------------------------------------------------------------------------------------------------------------------------------------------------------------------------------------------------------------------------------------------------------------------------------------------------------------------------------------------------------------------------------------------------------------------------------------------------------------------------------------------------------------------------------------------------------------------------------------------------------------------------------------------------------------------------------------------------------------------------------------------------------------------------------------------------------------------------------------------------------------------------------------------------------------------------------------------------------------------------------------------------------------------------------------------------------------------------------------------------|
| <b>Performance measure Name:</b>        | <b>Appropriateness of initial therapy (Pyridostigmine)</b>                                                                                                                                                                                                                                                                                                                                                                                                                                                                                                                                                                                                                                                                                                                                                                                                                                                                                                                                                                                                                                                                                                                                                                                                                        |
| <b>Description:</b>                     | These drugs prevent the breakdown of the neurotransmitter Ach (Acetylcholine) allowing more ACh to accumulate at the neuromuscular junction. ACh is the chemical compound that transmits nerve impulses to the muscle. Increased ACh improves the strength of muscles involved in eye movements, limb strength, swallowing, and breathing                                                                                                                                                                                                                                                                                                                                                                                                                                                                                                                                                                                                                                                                                                                                                                                                                                                                                                                                         |
| <b>Rationale:</b>                       | International guidelines suggest that optimizing doses and timing of this therapy brings great advantages in the rapid resolution of symptoms                                                                                                                                                                                                                                                                                                                                                                                                                                                                                                                                                                                                                                                                                                                                                                                                                                                                                                                                                                                                                                                                                                                                     |
| <b>Type of indicator:</b>               | Process                                                                                                                                                                                                                                                                                                                                                                                                                                                                                                                                                                                                                                                                                                                                                                                                                                                                                                                                                                                                                                                                                                                                                                                                                                                                           |
| <b>Improvement noted as:</b>            | Increase in the rate of optimized prescribed therapies                                                                                                                                                                                                                                                                                                                                                                                                                                                                                                                                                                                                                                                                                                                                                                                                                                                                                                                                                                                                                                                                                                                                                                                                                            |
| <b>Numerator Statement:</b>             | Number of adult patients with evidence of mild signs and symptoms and prescription of Pyridostigmine with a dose of 30–60mg every 4–8 hours<br><u>Included Population:</u> Patients with a diagnosis of MG.<br><u>Excluded Population:</u> None.                                                                                                                                                                                                                                                                                                                                                                                                                                                                                                                                                                                                                                                                                                                                                                                                                                                                                                                                                                                                                                  |
| <b>Denominator Statement:</b>           | Number of adult patients with evidence of mild signs and symptoms and prescription of Pyridostigmine<br><u>Included Population:</u> Patients with a diagnosis of MG.<br><u>Exclude Population:</u> None.                                                                                                                                                                                                                                                                                                                                                                                                                                                                                                                                                                                                                                                                                                                                                                                                                                                                                                                                                                                                                                                                          |
| <b>Data collection method:</b>          | Retrospective, patient records                                                                                                                                                                                                                                                                                                                                                                                                                                                                                                                                                                                                                                                                                                                                                                                                                                                                                                                                                                                                                                                                                                                                                                                                                                                    |
| <b>Data elements for the indicator:</b> | Evidence of Acetylcholinesterase-Inhibitors (AChE-I) therapy                                                                                                                                                                                                                                                                                                                                                                                                                                                                                                                                                                                                                                                                                                                                                                                                                                                                                                                                                                                                                                                                                                                                                                                                                      |
| <b>Data reported as:</b>                | Percentage                                                                                                                                                                                                                                                                                                                                                                                                                                                                                                                                                                                                                                                                                                                                                                                                                                                                                                                                                                                                                                                                                                                                                                                                                                                                        |
| <b>Expected performance:</b>            | >95%                                                                                                                                                                                                                                                                                                                                                                                                                                                                                                                                                                                                                                                                                                                                                                                                                                                                                                                                                                                                                                                                                                                                                                                                                                                                              |
| <b>Criteria to meet:</b>                | All the therapy optimized                                                                                                                                                                                                                                                                                                                                                                                                                                                                                                                                                                                                                                                                                                                                                                                                                                                                                                                                                                                                                                                                                                                                                                                                                                                         |
| <b>References:</b>                      | <p>Gilhus, N.E., Tzartos, S., Evoli, A. et al. Myasthenia gravis. Nat Rev Dis Primers 5, 30 (2019).</p> <p>James F. Howard, Myasthenia Gravis Foundation of America Inc. (MGFA). A manual for Health Care Provider.</p> <p>Bacci, E.D., Coyne, K.S., Poon, J.L. et al. Understanding side effects of therapy for myasthenia gravis and their impact on daily life. BMC Neurol 19, 335 (2019). <a href="https://doi.org/10.1186/s12883-019-1573-2">https://doi.org/10.1186/s12883-019-1573-2</a></p> <p>Sanders DB, Wolfe GI, Benatar M, Evoli A, Gilhus NE, Illa I, Kuntz N, Massey JM, Melms A, Murai H, Nicolle M, Palace J, Richman DP, Verschuuren J, Narayanaswami P. International consensus guidance for management of myasthenia gravis: Executive summary. Neurology. 2016 Jul 26;87(4):419-25. doi: 10.1212/WNL.0000000000002790. Epub 2016 Jun 29. PMID: 27358333; PMCID: PMC4977114.</p> <p>Narayanaswami P, Sanders DB, Wolfe G, Benatar M, Cea G, Evoli A, Gilhus NE, Illa I, Kuntz NL, Massey J, Melms A, Murai H, Nicolle M, Palace J, Richman D, Verschuuren J. International Consensus Guidance for Management of Myasthenia Gravis: 2020 Update. Neurology. 2021 Jan 19;96(3):114-122. doi: 10.1212/WNL.0000000000011124. Epub 2020 Nov 3. PMID: 33144515.</p> |
