# Supplementary material for: Development of a Model Care Pathway for Myasthenia Gravis
Source: MDPI journal article supplement (doi:10.3390/ijerph182111591), 2021-11-04
Supplement: s1 [file s1]

*S3 - Characteristics of included guidelines across the USA, Europe, Japan, and their overall quality scores by AGREE-II tool.*

| <b>N</b>  | <b>Title</b>                                                                                                                                                       | <b>Year</b> | <b>Society/Developer</b>                                           | <b>Country</b> | <b>Developed methods</b> | <b>AGREE-II. Overall Quality</b> |
|-----------|--------------------------------------------------------------------------------------------------------------------------------------------------------------------|-------------|--------------------------------------------------------------------|----------------|--------------------------|----------------------------------|
| <b>1</b>  | International Consensus Guidance for the Management of Myasthenia Gravis                                                                                           | 2016        | American Academy of Neurology                                      | America        | Consensus-based          | 5/7                              |
| <b>2</b>  | Plasmapheresis in neurologic disorders                                                                                                                             | 2011        | American Academy of Neurology                                      | America        | Evidence-based           | 6/7                              |
| <b>3</b>  | Intravenous immunoglobulin in the treatment of neuromuscular disorders                                                                                             | 2012        | American Academy of Neurology                                      | America        | Evidence-based           | 6/7                              |
| <b>4</b>  | Repetitive nerve stimulation and single-fiber electromyography in the evaluation of patients with suspected myasthenia gravis or Lambert-Eaton myasthenic syndrome | 2015        | American Association of Electrodiagnostic Medicine                 | America        | Literature review        | 5/7                              |
| <b>5</b>  | Thymectomy for autoimmune myasthenia gravis                                                                                                                        | 2000        | American Academy of Neurology                                      | America        | Evidence-based review    | 6/7                              |
| <b>6</b>  | Care of the Patient with Myasthenia Gravis                                                                                                                         | 2014        | American Association of Neuroscience Nurses                        | America        | Evidence-based review    | 4/7                              |
| <b>7</b>  | EFNS/ENS Guidelines for the treatment of ocular myasthenia                                                                                                         | 2013        | European Federation of Neurological Societies                      | Europe         | Literature review        | 6/7                              |
| <b>8</b>  | Guidelines for treatment of autoimmune neuromuscular transmission disorders                                                                                        | 2010        | European Federation of Neurological Societies                      | Europe         | Literature review        | 6/7                              |
| <b>9</b>  | EFNS guidelines for the use of intravenous immunoglobulin in treatment of neurological diseases                                                                    | 2008        | European Federation of Neurological Societies                      | Europe         | Literature review        | 5/7                              |
| <b>10</b> | Myasthenia gravis: Association of British Neurologists' management guidelines                                                                                      | 2015        | Association of British Neurologists                                | UK             | Literature review        | 6/7                              |
| <b>11</b> | Myasthenia in pregnancy: best practice guidelines from a UK multispecialty working group.                                                                          | 2013        | UK multispecialty working group                                    | UK             | Literature review        | 6/7                              |
| <b>12</b> | Consensus statement: the use of intravenous immunoglobulin in the treatment of neuromuscular conditions.                                                           | 2009        | American Association of Neuromuscular & Electrodiagnostic Medicine | America        | Consensus-based          | 4/7                              |
| <b>13</b> | Japanese clinical guidelines for myasthenia gravis: Putting into practice                                                                                          | 2015        | Japanese Society for Neuroimmunology                               | Japan          | Literature review        | 6/7                              |
