# Supplementary material for: Development of a Model Care Pathway for Myasthenia Gravis
Source: Int J Environ Res Public Health. 2021 Nov 4;18(21):11591. doi: 10.3390/ijerph182111591 (PMC8582978; doi:10.3390/ijerph182111591)
Supplement: Supplementary file 1 [file ijerph-18-11591-s001.zip]

Archive with 7 entries (7 files):
- S1_ Experts_Recruitment criteria_MG.pdf
- S2_MG Questionnaire_Delphi study.pdf
- S3_Characteristics of included guidlines.pdf
- S4_Characterstics of included reviews and other documents.pdf
- S5_Model pathway of MG.pdf
- S6_Detailed description of a Key intervention.pdf
- S7_Detailed description of a Process indicator.pdf
