# Supplementary figures and images for: Development of a Model Care Pathway for Myasthenia Gravis
Source: MDPI journal article supplement (doi:10.3390/ijerph182111591), 2021-11-04

## Diagnosis

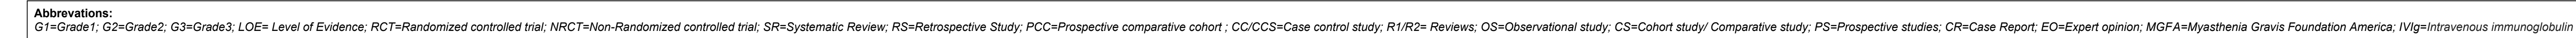

Supplement: s1 [file s1]
